# Supplementary material for: Electrochemical degradation of perfluorooctanoic acid (PFOA) by Yb-doped Ti/SnO2–Sb/PbO2anodes and determination of the optimal conditions
Source: Royal Society of Chemistry journal article supplement (doi:10.1039/c5ra14299g), 2015-01-01
Supplement: c5ra14299g1.pdf [file c5ra14299g1.pdf]

## Supporting information

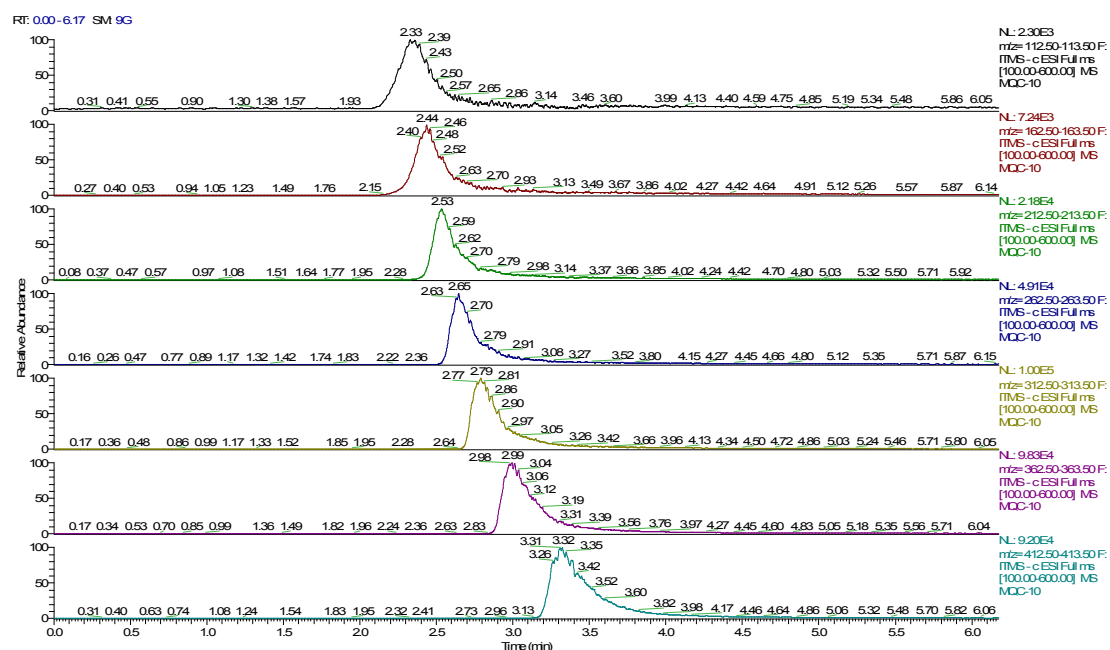

Fig. S1. Analyte-specific mass spectrogram of standard PFCAs.

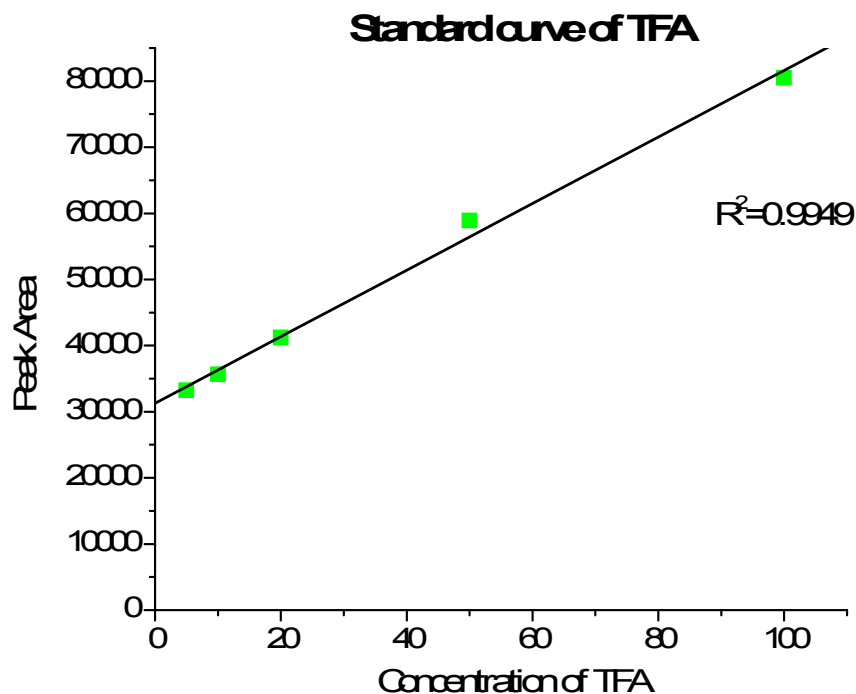

Fig. S2 (a). Standard curve of TFA.

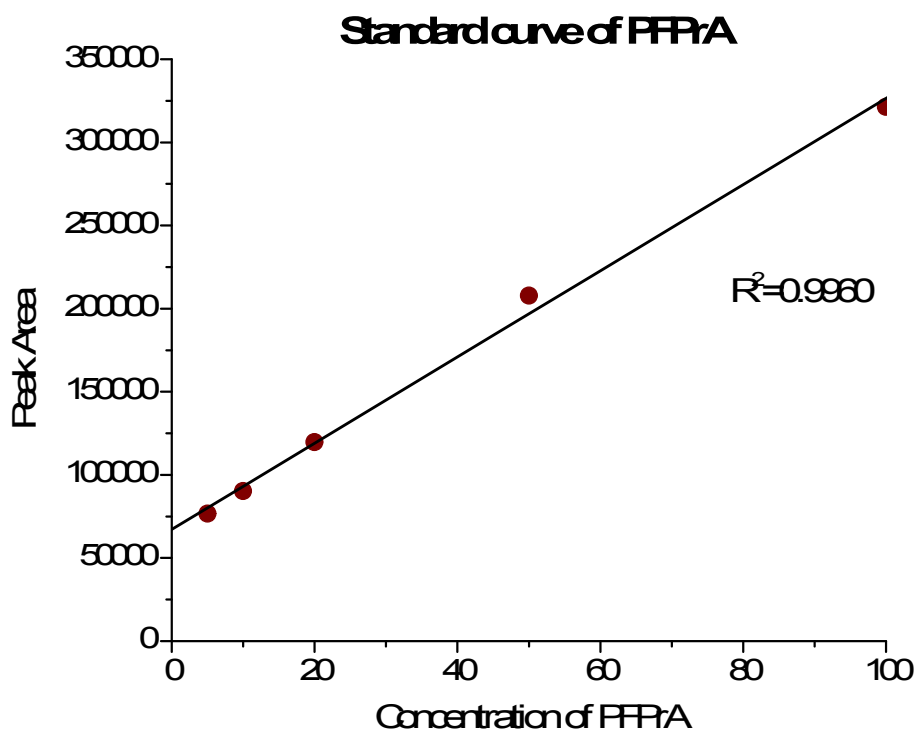

Fig. S2 (b). Standard curve of PFPrA.

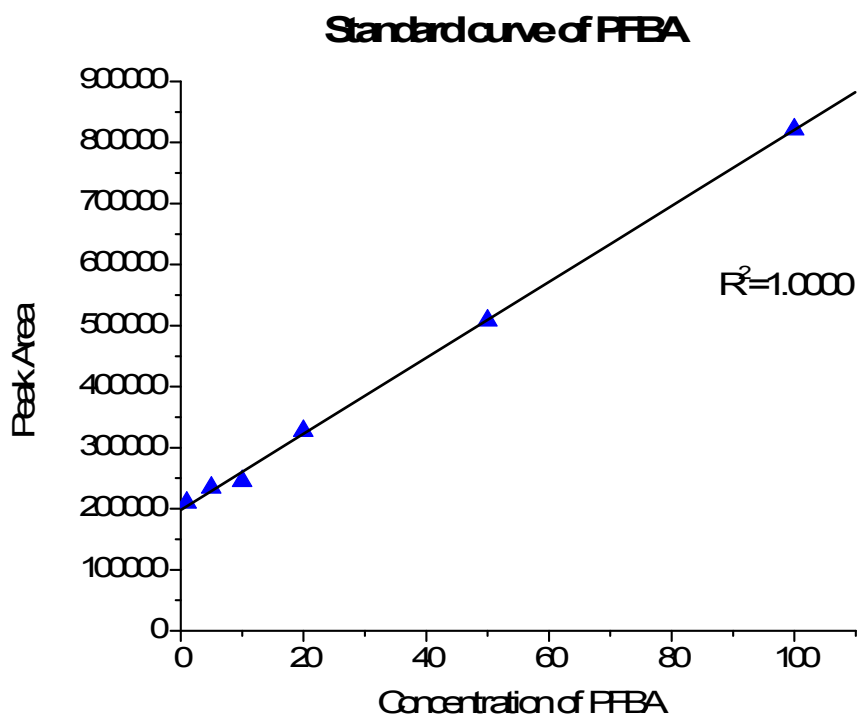

Fig. S2 (c). Standard curve of PFBA.

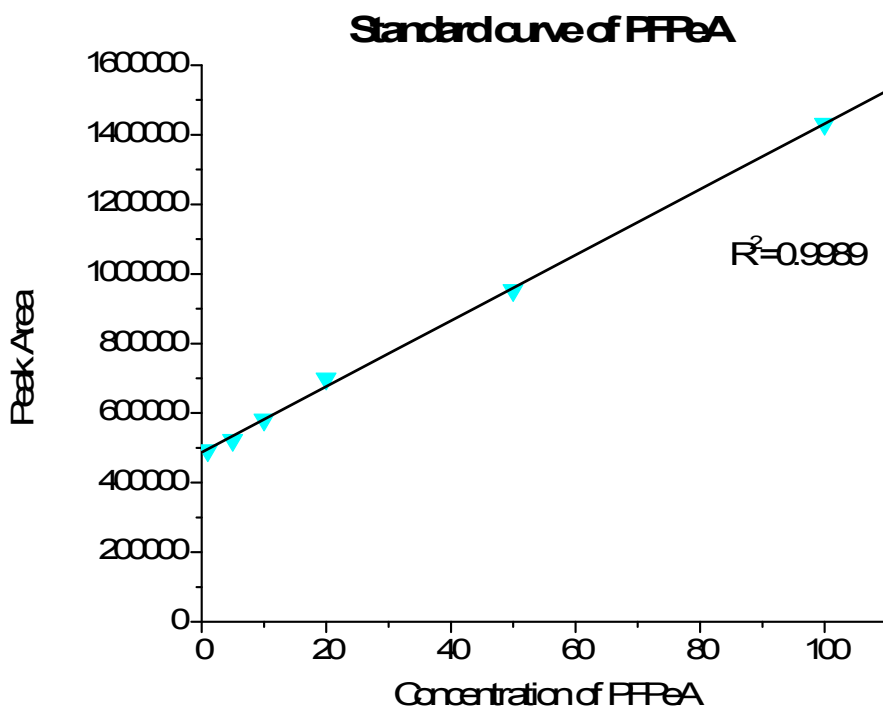

Fig. S2 (d). Standard curve of PFPeA.

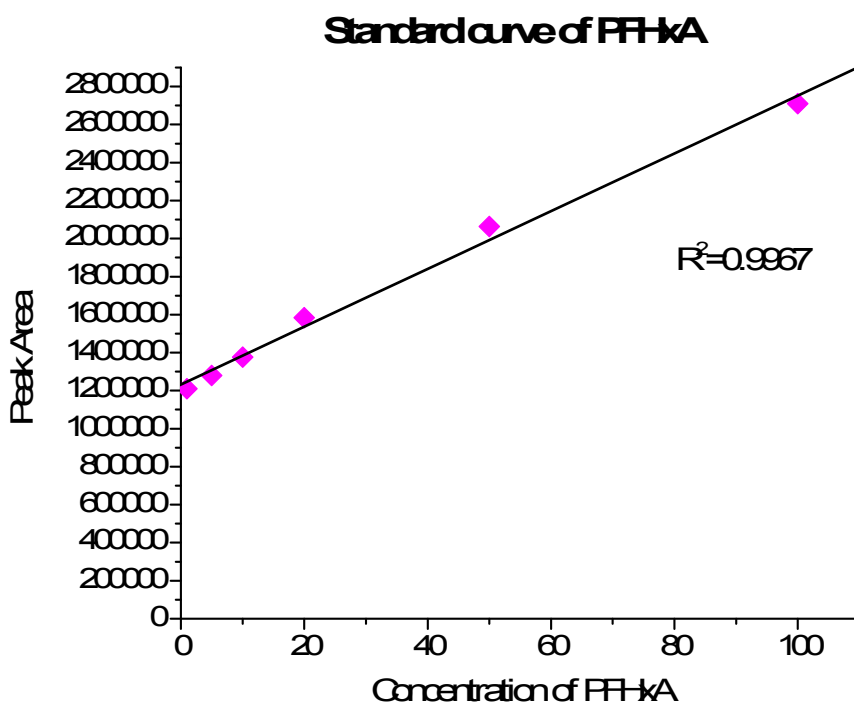

Fig. S2 (e). Standard curve of PFHxA.

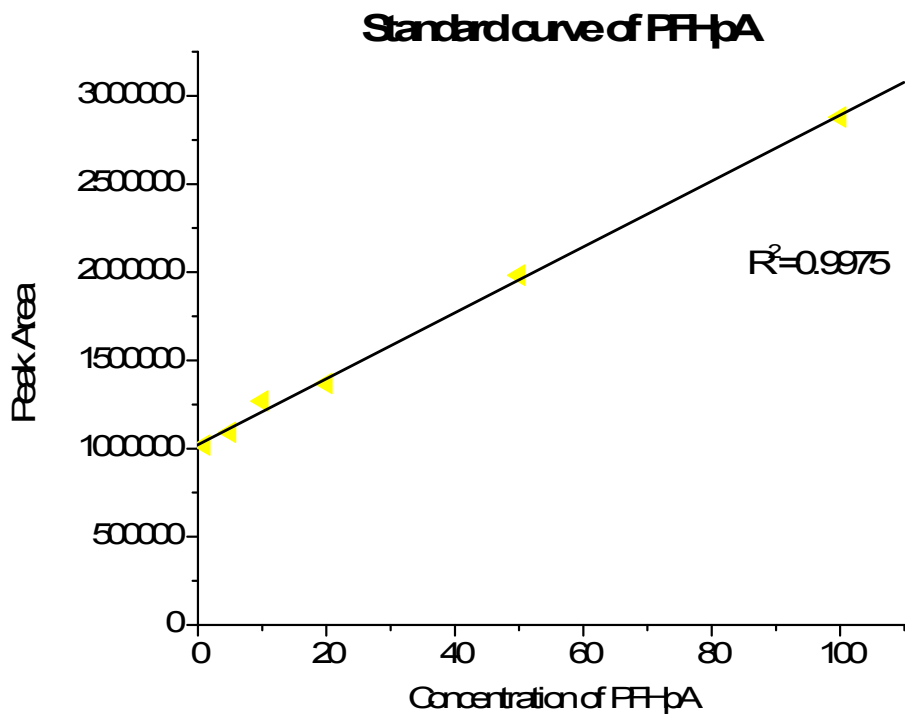

Fig. S2 (f). Standard curve of PFHpA.

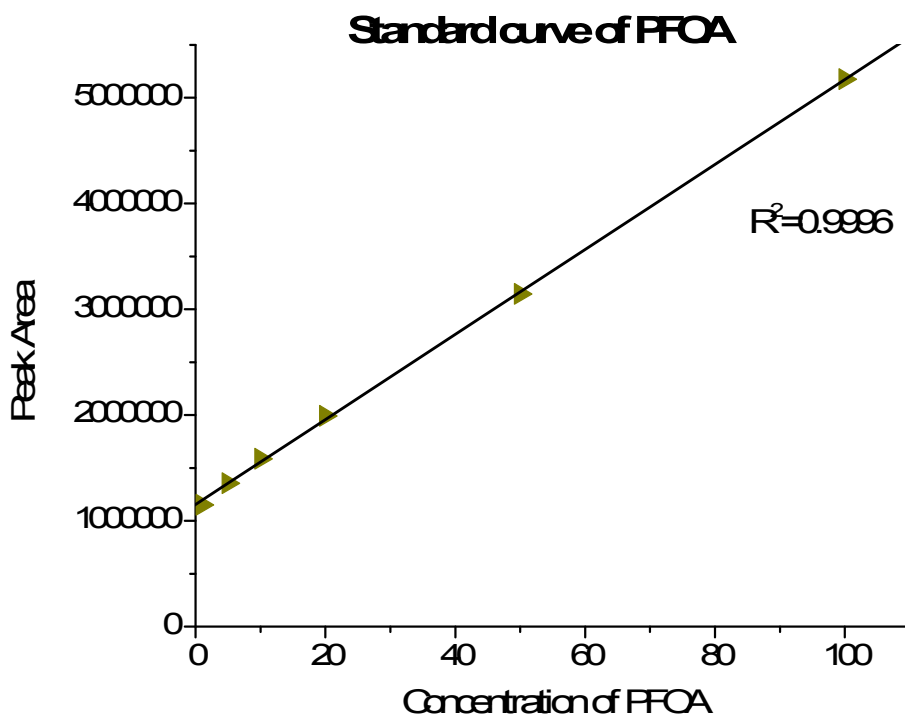

Fig. S2 (g). Standard curve of PFOA.

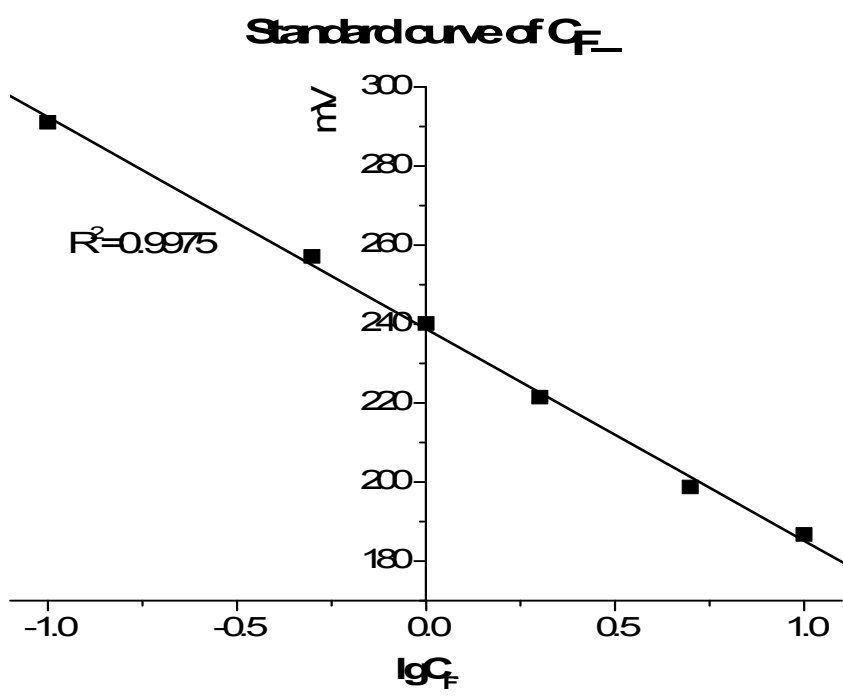

**Fig. S3. Standard curve of fluoride ion.**
